# Supplementary material for: Gate-tunable all-inorganic QLED with enhanced charge injection balance
Source: Royal Society of Chemistry journal article supplement (doi:10.1039/c9tc06088j), 2019-12-05
Supplement: c9tc06088j1.pdf [file c9tc06088j1.pdf]

## Supporting Information

### Gate-Tunable All-Inorganic QLED with Enhanced Charge Injection Balance

Qizhen Chen<sup>a</sup>, Yujie Yan, Xiaomin Wu, Xiumei Wang, Guocheng Zhang<sup>b</sup>, Jinwei Chen, Huipeng Chen\*, Tailiang Guo

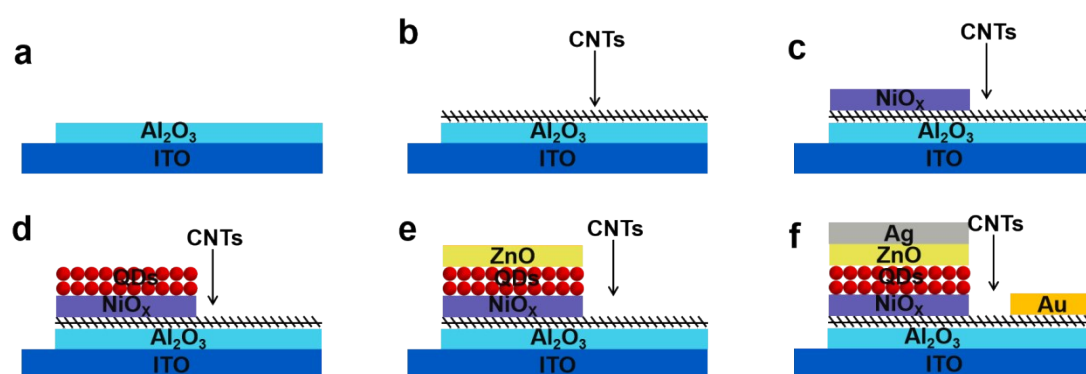

**Fig. S1** The technological preparation process of 3-terminal all-inorganic QLED. This is fabrication steps of 3-terminal all-inorganic QLED, **1a** shown the deposition of  $\text{Al}_2\text{O}_3$  dielectric layer by ALD on glass substrate. The source network was formed by spin-coated CNTs solution and the other functional layers of QLED were all deposited by solution process demonstrated in Fig. S1b-e. The procedure illustrated in Fig. S1f was the thermally evaporation of source contact and drain electrodes.

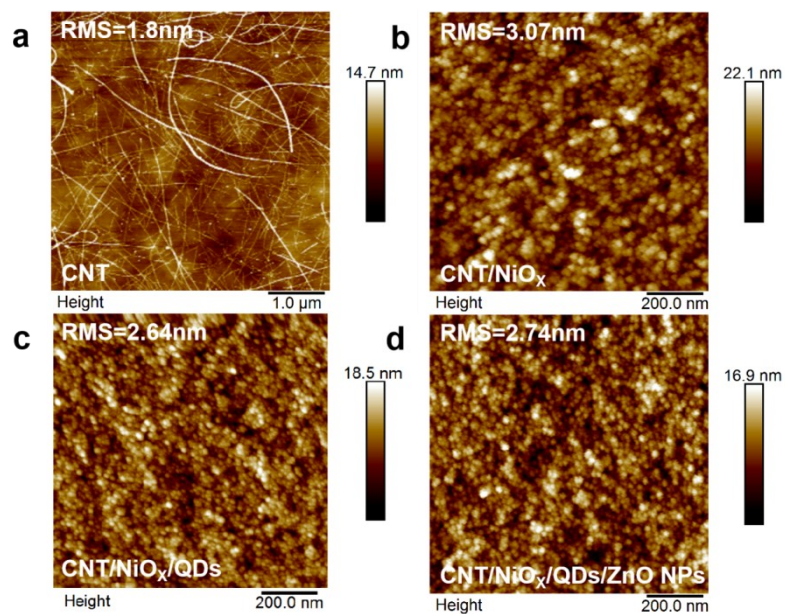

**Fig. S2.** AFM characterizations of the multilayers of CNTs, CNTs/NiO<sub>x</sub>, CNTs/NiO<sub>x</sub>/QDs and CNTs/NiO<sub>x</sub>/QDs/ZnO NPs films with root-mean-square (RMS) surface roughness is 1.8nm, 3.07nm, 2.64nm and 2.74nm, respectively.

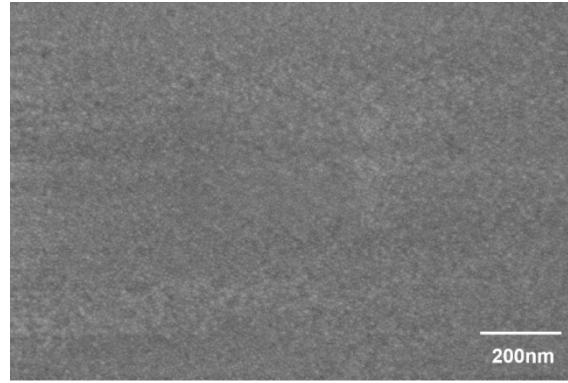

**Fig. S3.** The scanning electron microscope (SEM) of QDs, which shown a flat and compact film.

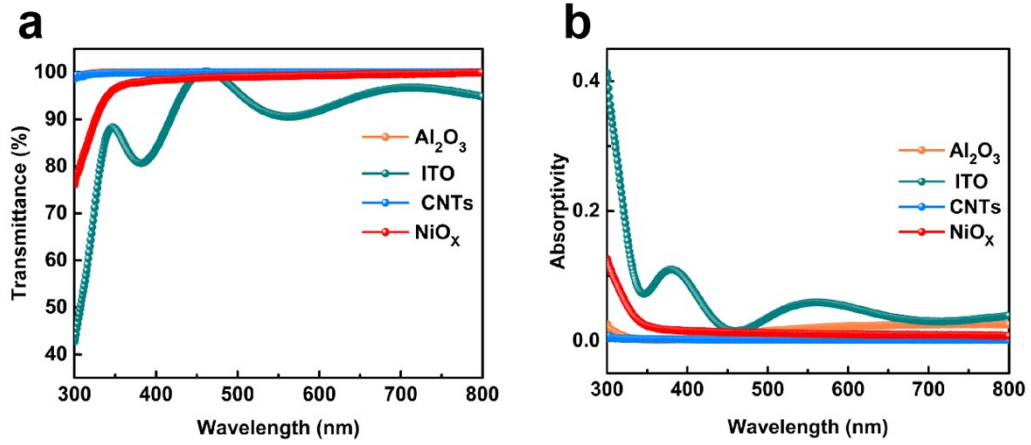

**Fig. S4** (a), (b) The transmittance and absorbance spectra of ITO, Al<sub>2</sub>O<sub>3</sub>, CNTs, NiO<sub>x</sub> film deposited on glass substrate of the wavelength range is between 300 to 800 nm.

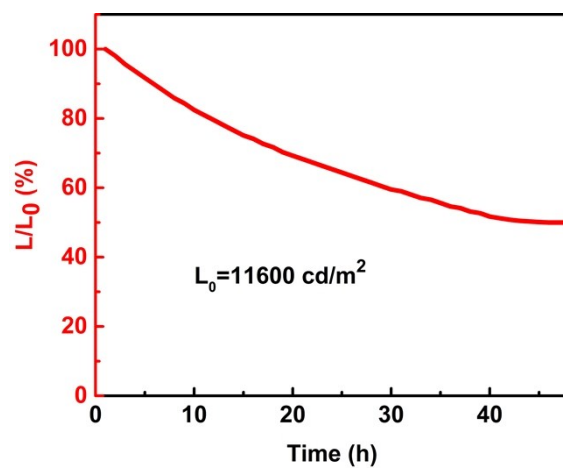

**Fig. S5** The stability when the gate-tunable all-inorganic QLED was switch on continuously for a long period.
